# Supplementary material for: Functionalization of Fe3O4@SiO2 nanoparticles with Cu(i)-thiosemicarbazone complex as a robust and efficient heterogeneous nanocatalyst for N-arylation of N-heterocycles with aryl halides
Source: Royal Society of Chemistry journal article supplement (doi:10.1039/d3ra06327e), 2023-01-01

## RSC Advances

### (Electronic Supplementary Information)

---

# Functionalization of Fe<sub>3</sub>O<sub>4</sub>@SiO<sub>2</sub> nanoparticles with Cu(I)-thiosemicarbazone complex as a robust and efficient heterogeneous nanocatalyst for N-arylation of N-heterocycles with aryl halides

Narjes Kaviani,<sup>a</sup> Somayeh Behrouz,<sup>b\*</sup> Abbas Ali Jafari,<sup>a\*</sup> Mohammad Navid Soltani Rad<sup>b</sup>

<sup>a</sup> Department of Chemistry, Faculty of Science, Yazd University, Yazd, Iran

<sup>b</sup> Department of Chemistry, Shiraz University of Technology, Shiraz 71555-313, Iran

\* Corresponding author. Tel.: +98 71 3735 4500; fax: +98 71 3735 4520; e-mail address: behrouz@sutech.ac.ir (S. Behrouz), Jafari@yazd.ac.ir (Abbas Ali Jafari)

## Table of Content

| <b>Content</b>                                        | <b>Page</b> |
|-------------------------------------------------------|-------------|
| Data of synthesized compounds                         | 3           |
| <sup>1</sup> HNMR and <sup>13</sup> CNMR of <b>3a</b> | 8           |
| <sup>1</sup> HNMR and <sup>13</sup> CNMR of <b>3b</b> | 9           |
| <sup>1</sup> HNMR and <sup>13</sup> CNMR of <b>3c</b> | 10          |
| <sup>1</sup> HNMR and <sup>13</sup> CNMR of <b>3d</b> | 11          |
| <sup>1</sup> HNMR and <sup>13</sup> CNMR of <b>3e</b> | 12          |
| <sup>1</sup> HNMR and <sup>13</sup> CNMR of <b>3f</b> | 13          |
| <sup>1</sup> HNMR and <sup>13</sup> CNMR of <b>3g</b> | 14          |
| <sup>1</sup> HNMR and <sup>13</sup> CNMR of <b>3h</b> | 15          |
| <sup>1</sup> HNMR and <sup>13</sup> CNMR of <b>3i</b> | 16          |
| <sup>1</sup> HNMR and <sup>13</sup> CNMR of <b>3j</b> | 17          |
| <sup>1</sup> HNMR and <sup>13</sup> CNMR of <b>3k</b> | 18          |
| <sup>1</sup> HNMR and <sup>13</sup> CNMR of <b>3l</b> | 19          |
| <sup>1</sup> HNMR and <sup>13</sup> CNMR of <b>3m</b> | 20          |
| <sup>1</sup> HNMR and <sup>13</sup> CNMR of <b>3n</b> | 21          |
| <sup>1</sup> HNMR and <sup>13</sup> CNMR of <b>3o</b> | 22          |

*1-phenylpyrimidine-2,4(1H,3H)-dione (3a)*

Column chromatography on silica gel (EtOAc:*n*-hexane, 2:1) afforded the product as a white solid; yield: 67%; mp 241-243 °C (Lit.<sup>1</sup> 242-244 °C); <sup>1</sup>H NMR (250 MHz, DMSO-*d*<sub>6</sub>): δ<sub>ppm</sub> = 5.37 (d, *J* = 7.7 Hz, 1H, C(5)-H of uracil), 7.28-7.47 (complex, 4H, aryl, C(6)-H of uracil), 7.76 (d, *J* = 7.2 Hz, 1H, C(6)-H, uracil), 11.16 (s, 1H, N(3)-H of uracil); <sup>13</sup>C NMR (62.5 MHz, DMSO-*d*<sub>6</sub>): δ<sub>ppm</sub> = 102.2, 121.9, 125.4, 128.4, 132.2, 143.6, 153.8, 161.4; IR (KBr): 3170, 3045, 1732, 1695, 1601, 1448 cm<sup>-1</sup>.

*1-(4-methoxyphenyl)pyrimidine-2,4(1H,3H)-dione (3b)*

Column chromatography on silica gel (EtOAc:*n*-hexane, 2:1) afforded the product as a white solid; yield: 65%; mp 227-229 °C (Lit.<sup>1</sup> 228-229 °C); <sup>1</sup>H NMR (250 MHz, DMSO-*d*<sub>6</sub>): δ<sub>ppm</sub> = 3.70 (s, 3H, OCH<sub>3</sub>), 5.54 (d, *J* = 7.8 Hz, 1H, C(5)-H of uracil), 6.84 (d, *J* = 8.6 Hz, 2H, aryl), 7.14 (d, *J* = 8.6 Hz, 2H, aryl), 7.69 (d, *J* = 7.8 Hz, 1H, C(6)-H of uracil), 11.17 (s, 1H, N(3)-H of uracil); <sup>13</sup>C NMR (62.5 MHz, DMSO-*d*<sub>6</sub>): δ<sub>ppm</sub> = 57.7, 102.8, 115.5, 123.4, 125.4, 143.8, 152.4, 157.4, 162.0; IR (KBr): 3151, 3010, 2953, 1729, 1685, 1510, 1449, 1242 cm<sup>-1</sup>.

*5-methyl-1-phenylpyrimidine-2,4(1H,3H)-dione (3c)*

Column chromatography on silica gel (EtOAc:*n*-hexane, 2:1) afforded the product as a white solid; yield: 59%; mp 199-201 °C (Lit.<sup>1</sup> 198-200 °C); <sup>1</sup>H NMR (250 MHz, DMSO-*d*<sub>6</sub>): δ<sub>ppm</sub> = 1.96 (s, 3H, =CCH<sub>3</sub>), 7.54-7.61 (m, 2H, aryl), 7.68-7.74 (m, 1H, aryl), 8.00-8.03 (m, 2H, aryl), 8.10 (s, 1H, C(6)-H of thymine), 11.17 (s, 1H, N(3)-H of thymine); <sup>13</sup>C NMR (62.5 MHz, DMSO-*d*<sub>6</sub>): δ<sub>ppm</sub> = 14.6, 111.6, 122.7, 125.0, 129.5, 132.7, 134.9, 153.2, 164.8; IR (KBr): 3185, 3072, 2958, 1726, 1701, 1598, 1469 cm<sup>-1</sup>.

*5-methyl-1-p-tolylpyrimidine-2,4(1H,3H)-dione (3d)*

Column chromatography on silica gel (EtOAc:*n*-hexane, 2:1) afforded the product as a white solid; yield: 54%; mp 217-219 °C (Lit.<sup>1</sup> 216-217 °C); <sup>1</sup>H NMR (250 MHz, DMSO-*d*<sub>6</sub>): δ<sub>ppm</sub> = 2.05 (s, 3H, =CCH<sub>3</sub>), 2.72 (s, 3H, OCH<sub>3</sub>), 6.89 (d, *J* = 8.8 Hz, 2H, aryl), 7.60 (d, *J* = 9.0 Hz, 2H, aryl), 8.48 (s, 1H, C(6)-H of thymine), 11.86 (s, 1H, N(3)-H of thymine); <sup>13</sup>C NMR (62.5 MHz, DMSO-*d*<sub>6</sub>): δ<sub>ppm</sub>

= 16.4, 25.5, 112.8, 122.9, 128.5, 129.5, 135.9, 136.9, 154.6, 164.3; IR (KBr): 3178, 3065, 2969, 1723, 1697, 1602, 1479 cm<sup>-1</sup>.

*1,3-dimethyl-7-phenyl-1H-purine-2,6(3H,7H)-dione (3e)*

Column chromatography on silica gel (EtOAc:*n*-hexane, 2:1) afforded the product as a white solid; yield: 77%; mp 196-198 °C (Lit.<sup>2</sup> 195.5 °C); <sup>1</sup>H NMR (250 MHz, CDCl<sub>3</sub>): δ<sub>ppm</sub> = 3.33 (s, 3H, N(1)-CH<sub>3</sub>), 3.59 (s, 3H, N(1)-CH<sub>3</sub>), 7.43 (br s, 5H, aryl), 7.67 (s, 1H, C(8)-H of theophylline); <sup>13</sup>C NMR (62.5 MHz, CDCl<sub>3</sub>): δ<sub>ppm</sub> = 27.7, 29.7, 105.95, 126.1, 128.1, 129.1, 136.0, 141.4, 150.3, 152.4, 156.7; IR (KBr): 3047, 2978, 1715, 1701, 1654, 1474 cm<sup>-1</sup>.

*7-(4-methoxyphenyl)-1,3-dimethyl-1H-purine-2,6(3H,7H)-dione (3f)*

Column chromatography on silica gel (EtOAc:*n*-hexane, 2:1) afforded the product as a white foam (Lit.<sup>3</sup>); yield: 74%; <sup>1</sup>H NMR (250 MHz, CDCl<sub>3</sub>): δ<sub>ppm</sub> = 3.32 (s, 3H, N(1)-CH<sub>3</sub>), 3.58 (s, 3H, N(1)-CH<sub>3</sub>), 3.79 (s, 3H, OCH<sub>3</sub>), 6.92 (d, *J* = 9.0 Hz, 2H, aryl), 7.33 (d, *J* = 9.0 Hz, 2H, aryl), 7.62 (s, 1H, C(8)-H of theophylline); <sup>13</sup>C NMR (62.5 MHz, CDCl<sub>3</sub>): δ<sub>ppm</sub> = 28.1, 29.9, 55.3, 107.2, 114.9, 125.7, 127.9, 142.7, 150.5, 152.7, 155.6, 161.7; IR (KBr): 3061, 2947, 1719, 1702, 1659, 1468, 1236 cm<sup>-1</sup>.

*3,7-dimethyl-1-phenyl-1H-purine-2,6(3H,7H)-dione (3g)*

Column chromatography on silica gel (EtOAc:*n*-hexane, 2:1) afforded the product as a white solid; yield: 78%; mp 218-220 °C (Lit.<sup>4</sup> 218.5 °C); <sup>1</sup>H NMR (250 MHz, CDCl<sub>3</sub>): δ<sub>ppm</sub> = 3.61 (s, 3H, N(3)-CH<sub>3</sub>), 3.94 (s, 3H, N(7)-CH<sub>3</sub>), 7.22-7.26 (m, 2H, aryl), 7.44-7.50 (m, 3H, aryl), 7.55 (s, 1H, C(8)-H of theobromine); <sup>13</sup>C NMR (62.5 MHz, CDCl<sub>3</sub>): δ<sub>ppm</sub> = 27.2, 31.2, 106.4, 123.2, 125.8, 129.2, 130.4, 146.5, 148.1, 150.7, 165.8; IR (KBr): 3115, 2949, 1815, 1701, 1653, 1605, 1448 cm<sup>-1</sup>.

*1-(4-methoxyphenyl)-3,7-dimethyl-1H-purine-2,6(3H,7H)-dione (3h)*

Column chromatography on silica gel (EtOAc:*n*-hexane, 2:1) afforded the product as a white solid; yield: 76%; mp 181-183 °C (Lit.<sup>4</sup> 182.5 °C); <sup>1</sup>H NMR (250 MHz, CDCl<sub>3</sub>): δ<sub>ppm</sub> = 3.62 (s, 3H, N(3)-CH<sub>3</sub>), 3.82 (s, 3H, N(7)-CH<sub>3</sub>), 3.95 (s, 3H, OCH<sub>3</sub>), 6.97-7.02 (m, 2H, aryl), 7.12-7.16 (m, 2H, aryl), 7.53 (s, 1H, C(8)-H of theobromine); <sup>13</sup>C NMR (62.5 MHz, CDCl<sub>3</sub>): δ<sub>ppm</sub> = 28.3, 30.2, 53.9, 105.4,

115.1, 122.9, 124.2, 144.9, 149.2, 151.3, 157.5, 164.7; IR (KBr): 3130, 2979, 2839, 1869, 1708, 1663, 1602, 1469, 1243  $\text{cm}^{-1}$ .

*1-(4-methoxyphenyl)-1H-indole (3i)*

Column chromatography on silica gel (EtOAc:*n*-hexane, 1:1) afforded the product as a white solid; yield: 88%; mp 56-58 °C (Lit.<sup>5</sup> 57-59 °C); <sup>1</sup>H NMR (250 MHz, CDCl<sub>3</sub>):  $\delta_{\text{ppm}}$  = 3.71 (s, 3H, OCH<sub>3</sub>), 6.58 (br s, 1H, C(3)-H of indole), 6.73 (d, *J* = 7.5 Hz, 2H, aryl), 6.93 (d, *J* = 5.0 Hz, 2H, aryl), 7.09m (d, *J* = 5.0 Hz, 2H, aryl), 7.19 (br s, 2H, aryl), 7.83 (br s, 1H, C(2)-H of indole); <sup>13</sup>C NMR (62.5 MHz, CDCl<sub>3</sub>):  $\delta_{\text{ppm}}$  = 55.5, 102.4, 110.5, 114.5, 120.2, 121.6, 122.5, 126.3, 128.6, 129.3, 133.1, 136.8, 158.8; IR (KBr): 3050, 2975, 1669, 1597, 1463, 1238  $\text{cm}^{-1}$ .

*1-(2-methoxyphenyl)-1H-indole (3j)*

Column chromatography on silica gel (EtOAc:*n*-hexane, 1:1) afforded the product as a colorless oil (Lit.<sup>5</sup>); yield: 73%; <sup>1</sup>H NMR (250 MHz, CDCl<sub>3</sub>):  $\delta_{\text{ppm}}$  = 3.72 (s, 3H, OCH<sub>3</sub>), 6.67-6.74 (complex, 5H, aryl, C(3)-H of indole), 7.12-7.19 (m, 4H, aryl), 7.60 (br s, 1H, C(2)-H of indole); <sup>13</sup>C NMR (62.5 MHz, CDCl<sub>3</sub>):  $\delta_{\text{ppm}}$  = 56.1, 102.6, 110.1, 114.5, 119.1, 120.4, 121.8, 122.5, 123.2, 125.9, 127.0, 128.6, 130.6, 144.5, 146.2; IR (film): 3079, 2959, 1664, 1590, 1470, 1245  $\text{cm}^{-1}$ .

*1-phenyl-1H-benzo[d]imidazole (3k)*

Column chromatography on silica gel (EtOAc:*n*-hexane, 1:1) afforded the product as a white solid; yield: 92%; mp 91-93 °C (Lit.<sup>6</sup> 94-95 °C); <sup>1</sup>H NMR (250 MHz, CDCl<sub>3</sub>):  $\delta_{\text{ppm}}$  = 7.11-7.28 (m, 5H, aryl), 7.48-7.63 (m, 4H, aryl), 8.31 (s, 1H, C(2)-H of benzimidazole); <sup>13</sup>C NMR (62.5 MHz, CDCl<sub>3</sub>):  $\delta_{\text{ppm}}$  = 110.9, 120.5, 122.6, 123.4, 124.5, 128.1, 129.1, 133.7, 137.2, 142.1, 144.9; IR (KBr): 3015, 1645, 1600, 1497  $\text{cm}^{-1}$ .

*1-(naphthalen-1-yl)-1H-imidazole (3l)*

Column chromatography on silica gel (EtOAc:*n*-hexane, 1:1) afforded the product as a creamy solid; yield: 82%; mp 62-64 °C (Lit.<sup>7</sup> 63-64 °C); <sup>1</sup>H NMR (250 MHz, CDCl<sub>3</sub>):  $\delta_{\text{ppm}}$  = 6.68-6.76 (m, 2H, aryl), 6.85 (s, 1H, C(5)-H of imidazole), 7.09-7.11 (m, 2H, aryl), 7.12 (s, 1H, C(4)-H of imidazole), 7.22-7.25 (m, 2H, aryl), 7.41-7.52 (complex, 2H, aryl, C(2)-H of imidazole); <sup>13</sup>C NMR

(62.5 MHz, CDCl<sub>3</sub>):  $\delta_{\text{ppm}} = 119.3, 121.8, 122.5, 123.9, 125.4, 126.8, 127.7, 128.7, 129.2, 130.1, 133.3, 135.0, 139.3$ ; IR (KBr): 3052, 1684, 1580, 1468 cm<sup>-1</sup>.

*1-phenyl-1H-imidazole (3m)*

Column chromatography on silica gel (EtOAc:*n*-hexane, 2:1) afforded the product as a colorless liquid (Lit.<sup>8</sup>); yield: 93%; <sup>1</sup>H NMR (250 MHz, CDCl<sub>3</sub>):  $\delta_{\text{ppm}} = 6.96$  (s, 1H, C(5)-H of imidazole), 7.14 (s, 1H, C(4)-H of imidazole), 7.55-7.74 (complex, 4H, aryl, C(2)-H of imidazole), 8.03-8.06 (m, 2H, aryl); <sup>13</sup>C NMR (62.5 MHz, CDCl<sub>3</sub>):  $\delta_{\text{ppm}} = 118.3, 121.2, 127.2, 128.8, 129.6, 135.3, 137.3$ ; IR (film): 3077, 1675, 1617, 1500, 1457 cm<sup>-1</sup>.

*1-(4-methoxyphenyl)-1H-imidazole (3n)*

Column chromatography on silica gel (EtOAc:*n*-hexane, 2:1) afforded the product as a white solid; yield: 91%; mp 54-56 °C (Lit.<sup>8</sup> 55-57 °C); <sup>1</sup>H NMR (250 MHz, CDCl<sub>3</sub>):  $\delta_{\text{ppm}} = 3.85$  (s, 3H, OCH<sub>3</sub>), 6.92 (s, 1H, C(5)-H of imidazole), 7.08-7.15 (complex, 3H, aryl, C(4)-H of imidazole), 7.59 (s, 1H, C(2)-H of imidazole), 8.02-8.06 (s, 2H, aryl); <sup>13</sup>C NMR (62.5 MHz, CDCl<sub>3</sub>):  $\delta_{\text{ppm}} = 56.9, 115.1, 118.6, 123.4, 129.5, 130.8, 135.8, 159.6$ ; IR (KBr): 3058, 2972, 1679, 1602, 1482, 1229 cm<sup>-1</sup>.

*1,2-diphenyl-1H-imidazole (3o)*

Column chromatography on silica gel (EtOAc:*n*-hexane, 1:1) afforded the product as a white solid; yield: 79%; mp 86-88 °C (Lit.<sup>7</sup> 88-89 °C); <sup>1</sup>H NMR (250 MHz, CDCl<sub>3</sub>):  $\delta_{\text{ppm}} = 6.91$  (d, *J* = 1.0 Hz, 1H, C(5)-H of imidazole), 7.09 (d, *J* = 1.0 Hz, 1H, C(4)-H of imidazole), 7.21-7.30 (m, 5H, aryl), 7.42-7.45 (m, 3H, aryl), 7.55-7.58 (m, 5H, aryl); <sup>13</sup>C NMR (62.5 MHz, CDCl<sub>3</sub>):  $\delta_{\text{ppm}} = 115.9, 123.5, 125.7, 127.3, 128.1, 128.9, 129.2, 129.8, 130.8, 137.4, 144.8$ ; IR (KBr): 3078, 1693, 1517, 1479 cm<sup>-1</sup>.

1.

## Reference:

- [1] T. Zhou, T.-C. Li, Z.-C. Chen, Hypervalent iodine in synthesis. Part 86: Selective copper-catalyzed n-monoarylation and N<sup>1</sup>,N<sup>3</sup>-diarylation of uracil and its derivatives with diaryliodonium salts. *Helv. Chim. Acta*, **2005**, *88*, 290-296. doi: 10.1002/hlca.200590010
- [2] E. C. Taylor, F. Yoneda, Purine chemistry. XVI. One-step synthesis of 7-aryltheophyllines. *J. Org. Chem.*, **1972**, *37*, 4464-4465. doi: 10.1021/jo00799a037
- [3] D. Kim, H. Jun, H. Lee, S.-S. Hong, S. Hong, Development of new fluorescent xanthenes as kinase inhibitors. *Org. Lett.*, **2010**, *12*, 1212-1215. doi: 10.1021/ol100011n
- [4] M. N. Soltani Rad, S. Behrouz, M. M. Doroodmand, N. Moghtaderi, Copper nanoparticle-doped silica cuprous sulfate as a highly efficient and reusable heterogeneous catalysis for N-arylation of nucleobases and N-heterocyclic compounds. *Synthesis*, **2011**, *23*, 3915-3924. doi: 10.1055/s-0030-1260236
- [5] A. Kumar Verma, J. Singh, R. C. Larock, Benzotriazole: an efficient ligand for the copper-catalyzed N-arylation of indoles. *Tetrahedron*, **2009**, *65*, 8434-8439. doi: 10.1016/j.tet.2009.07.050
- [6] Y. Wang, Q. Yang, M. Zhang, D. Lin, N-Arylation of heterocycles catalyzed by activated-copper in pure water. *Tetrahedron Lett.*, **2013**, *54*, 1994-1997. doi: 10.1016/j.tetlet.2013.02.004
- [7] R. A. Altman, E. D. Koval, S. L. Buchwald, Copper-catalyzed N-arylation of imidazoles and benzimidazoles. *J. Org. Chem.*, **2007**, *72*, 6190-6199. doi: 10.1021/jo070807a
- [8] Q. Zhou, F. Du, Y. Chen, Y. Fu, W. Sun, Y. Wu, G. Chen, L-(-)-Quebrachitol as a ligand for selective copper(0)-catalyzed N-arylation of nitrogen-containing heterocycles. *J. Org. Chem.*, **2019**, *84*, 8160-8167. doi: 10.1021/acs.joc.9b00997

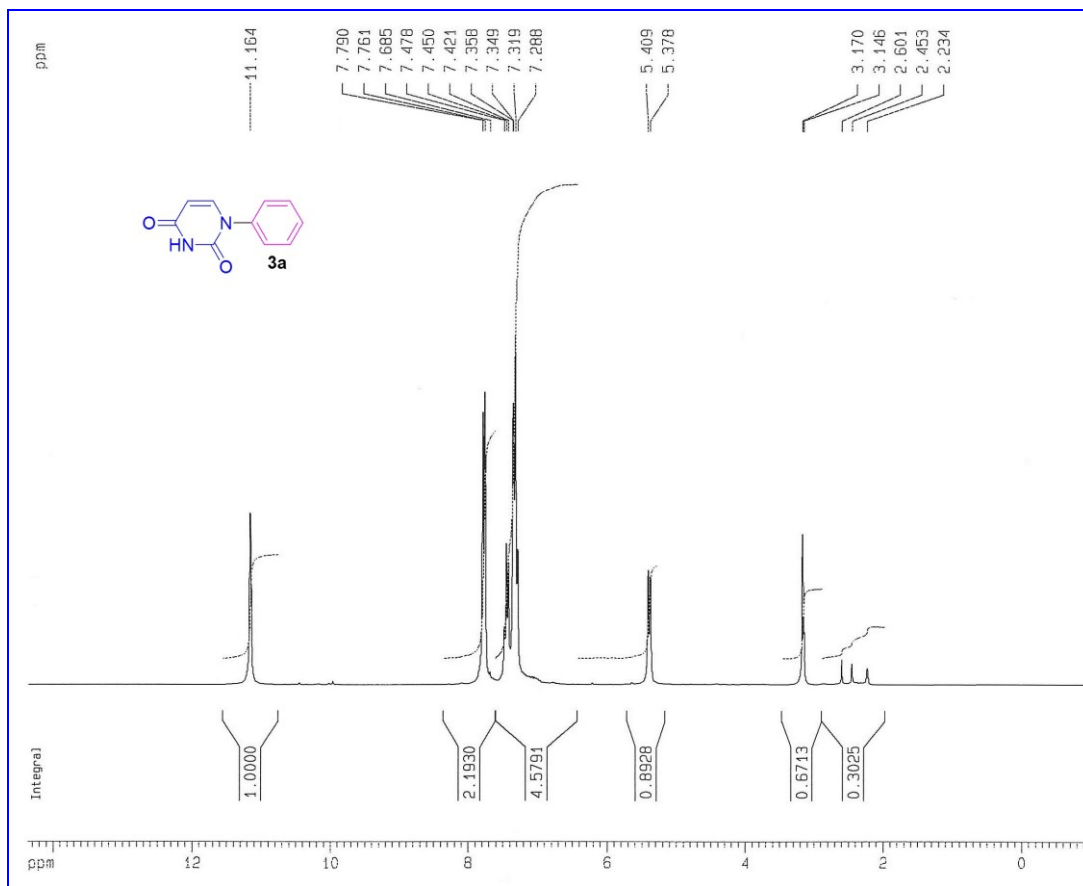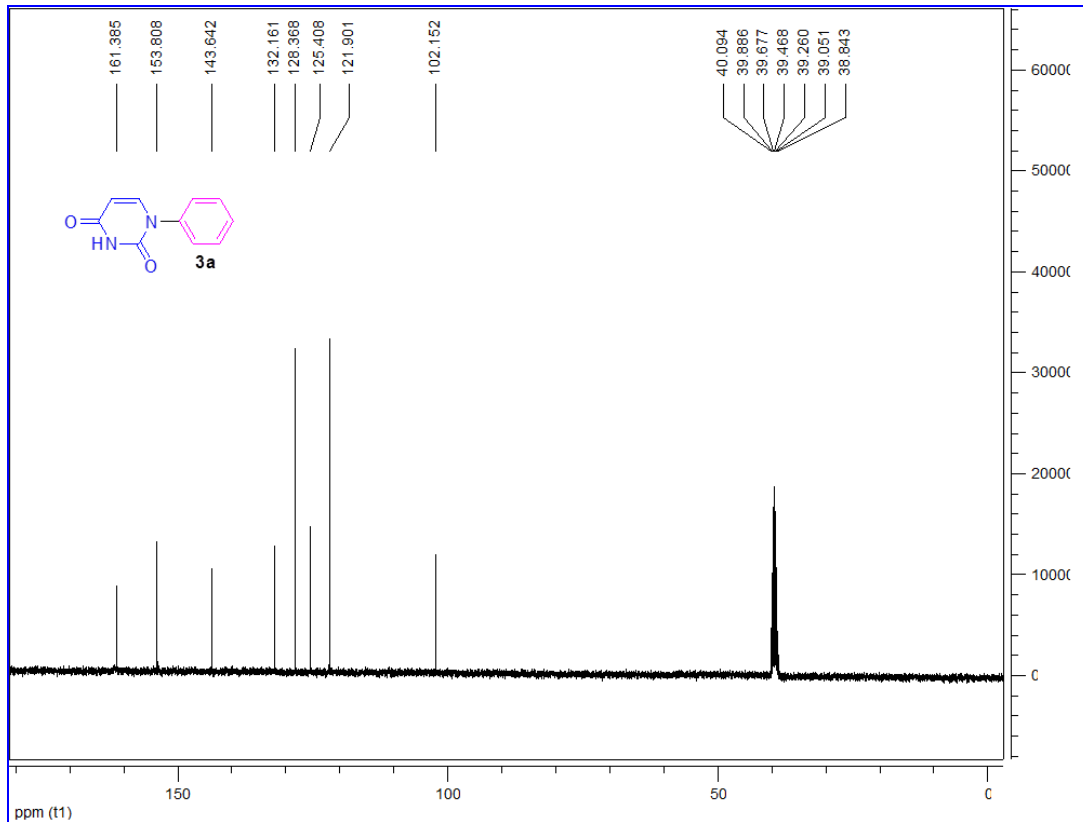



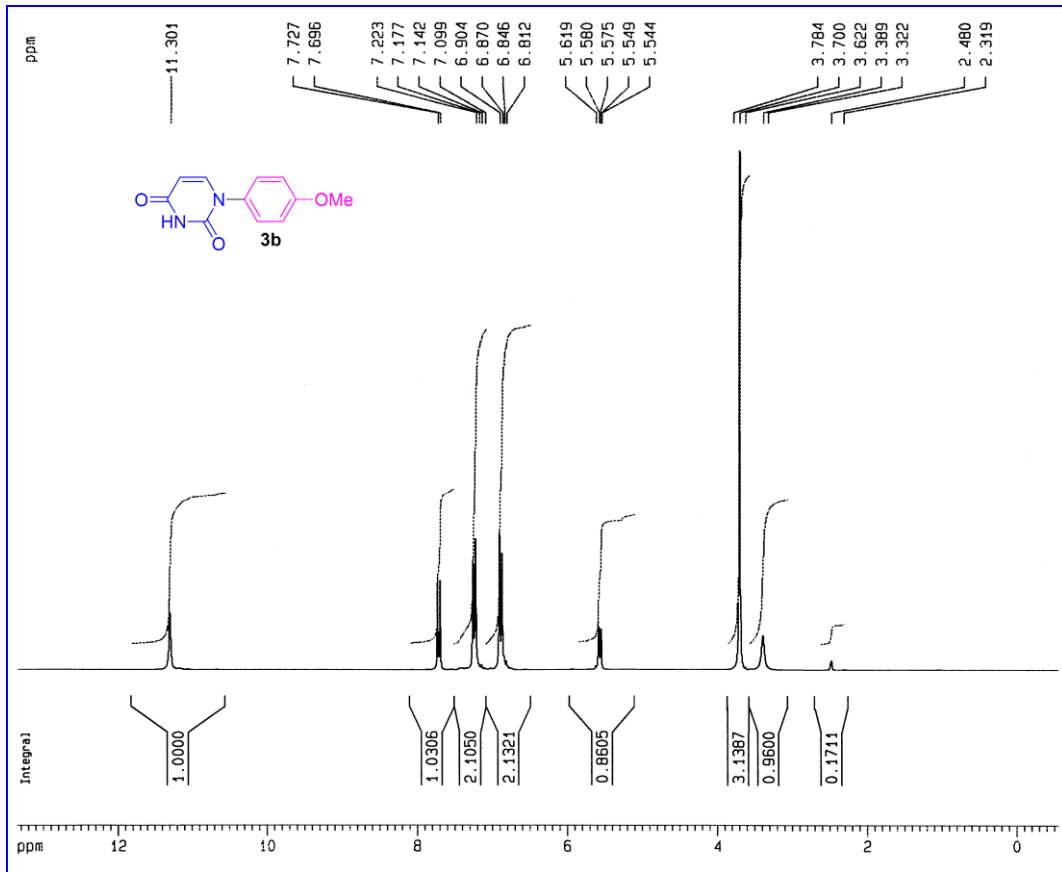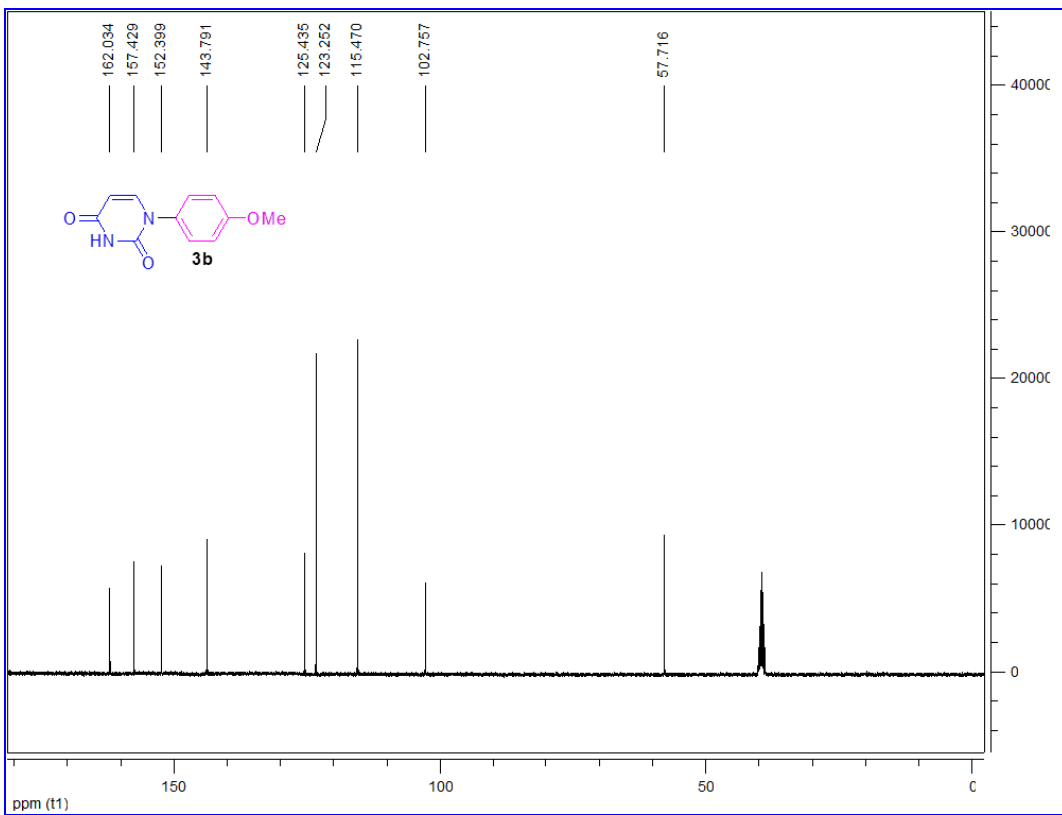

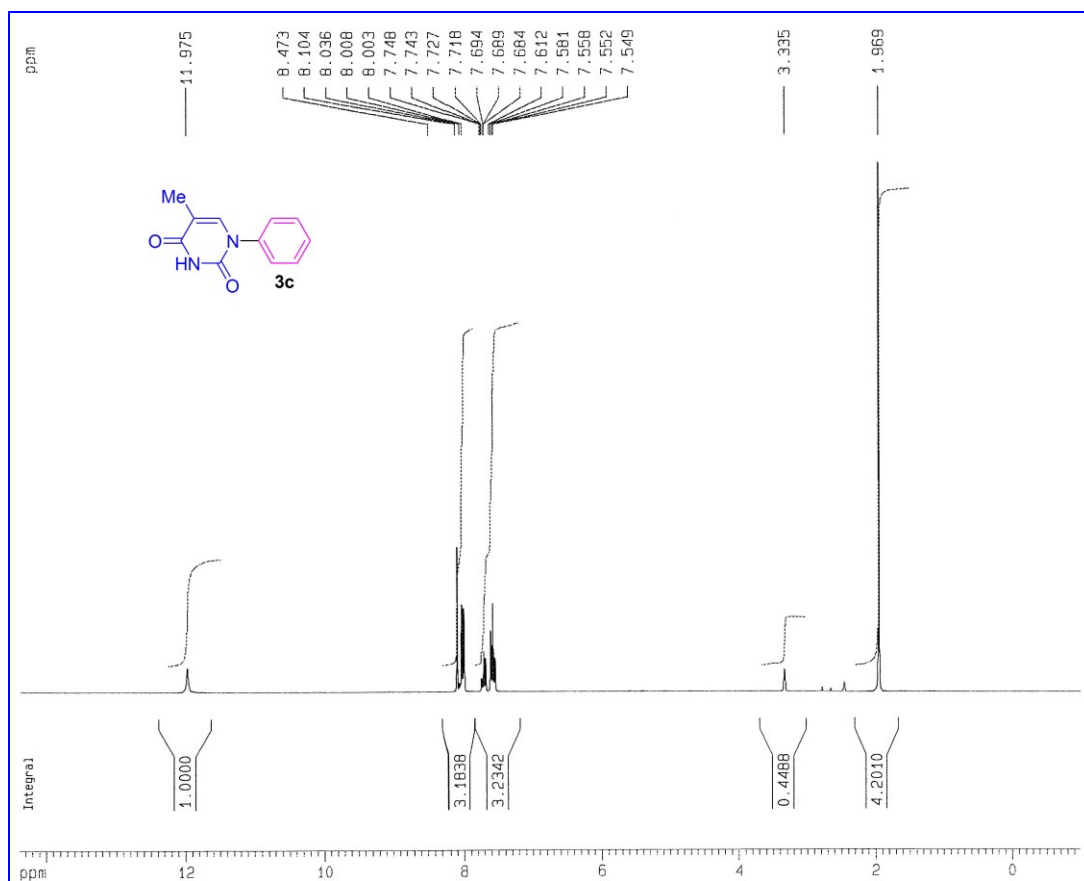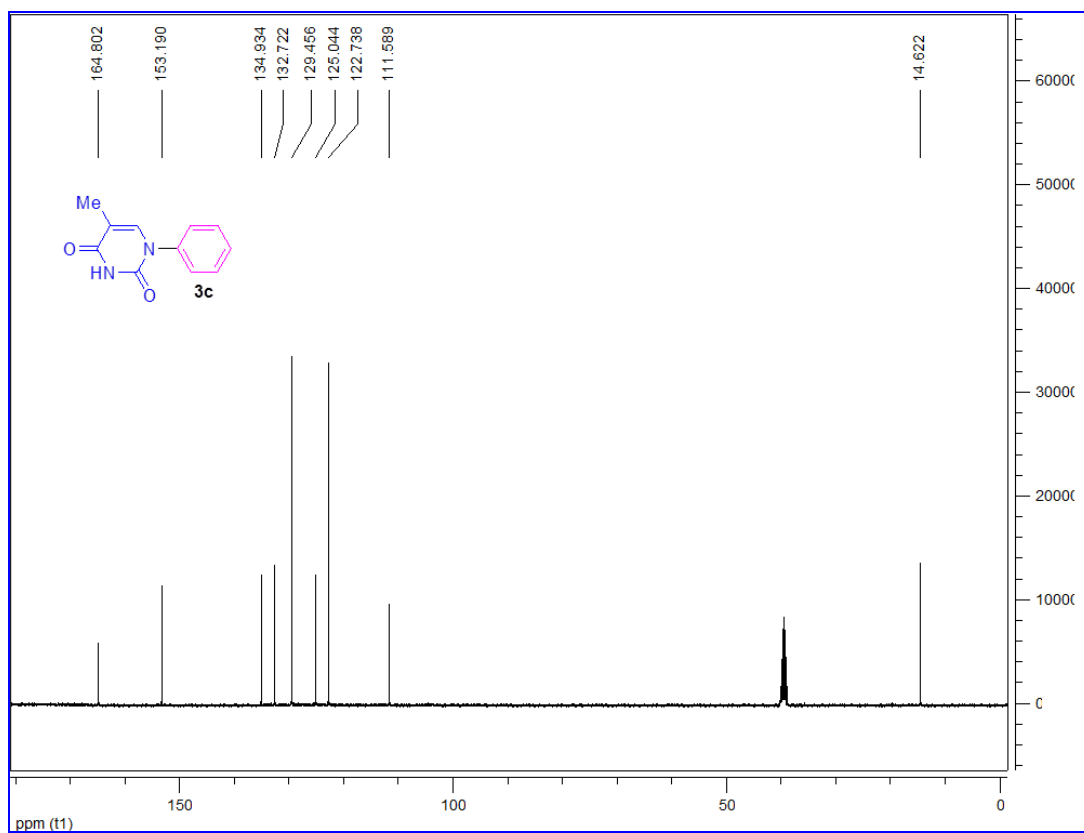

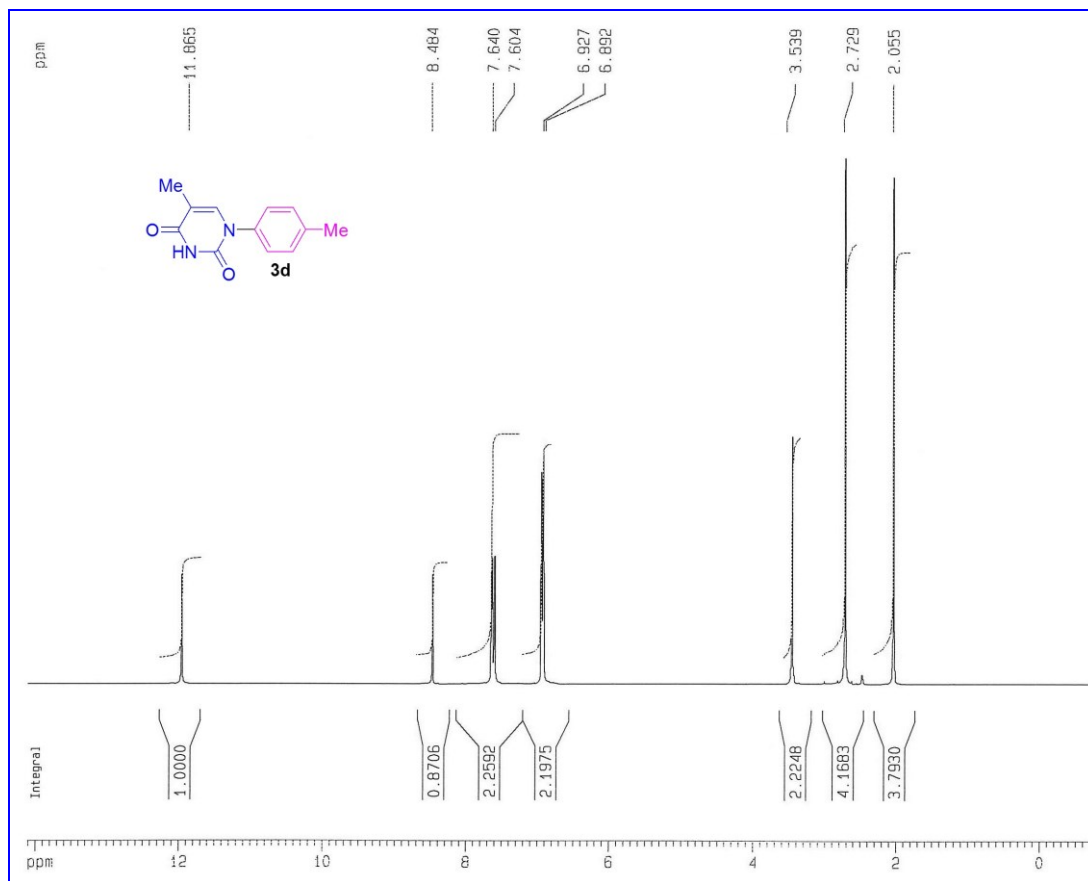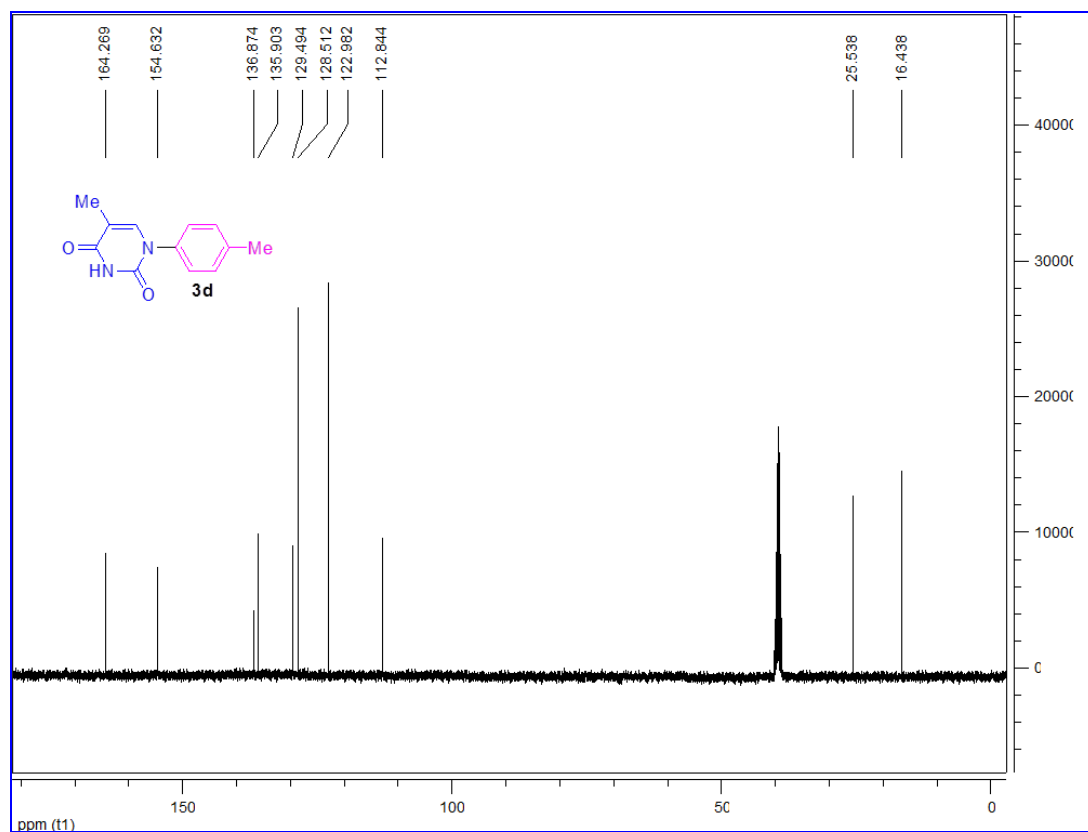

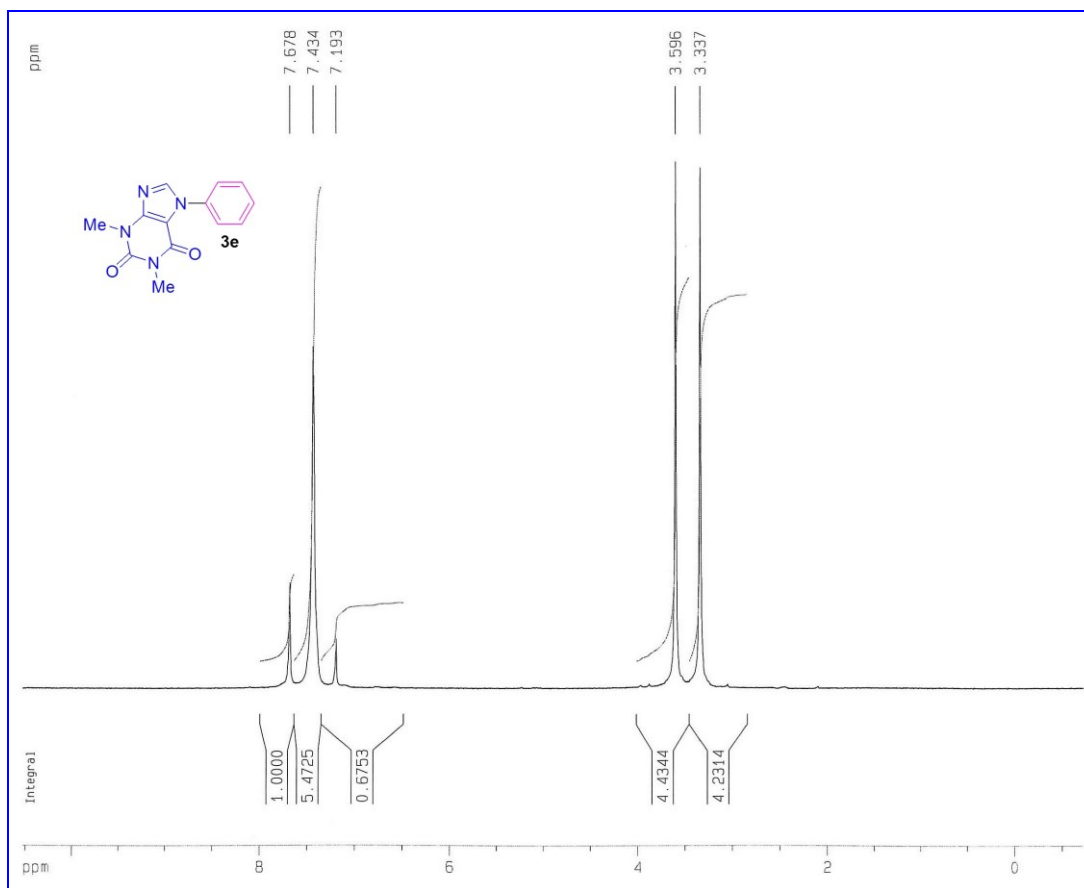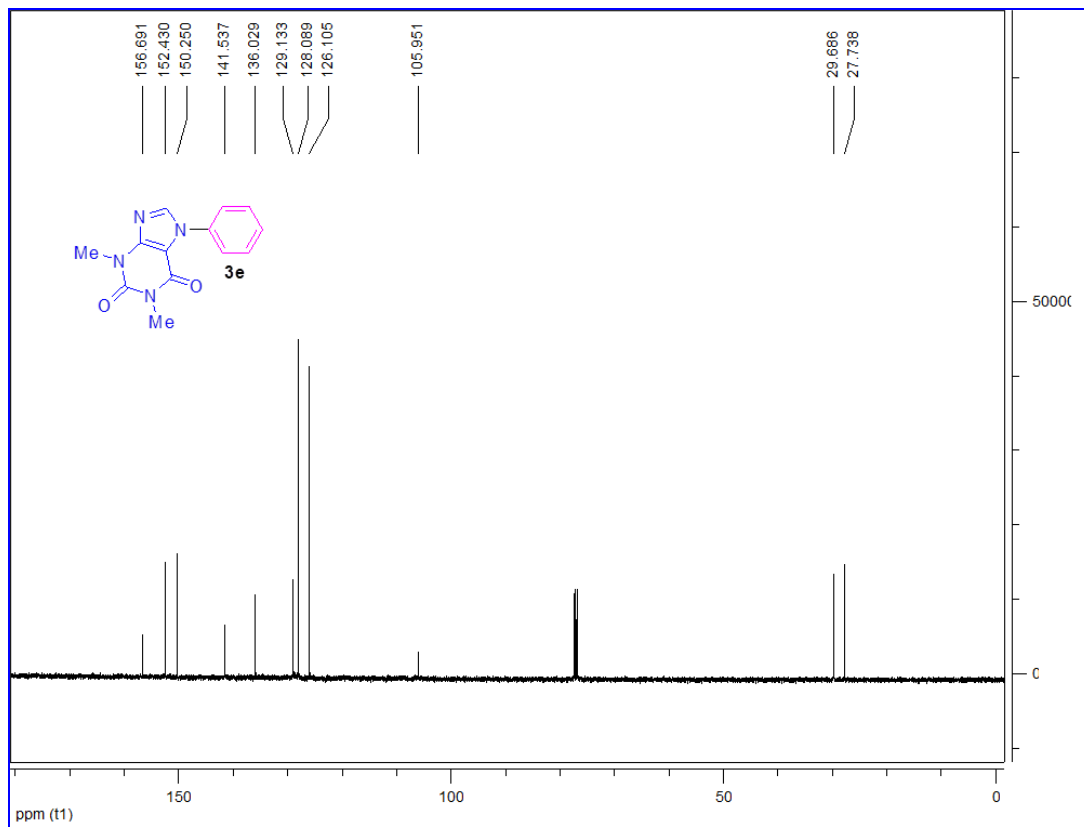

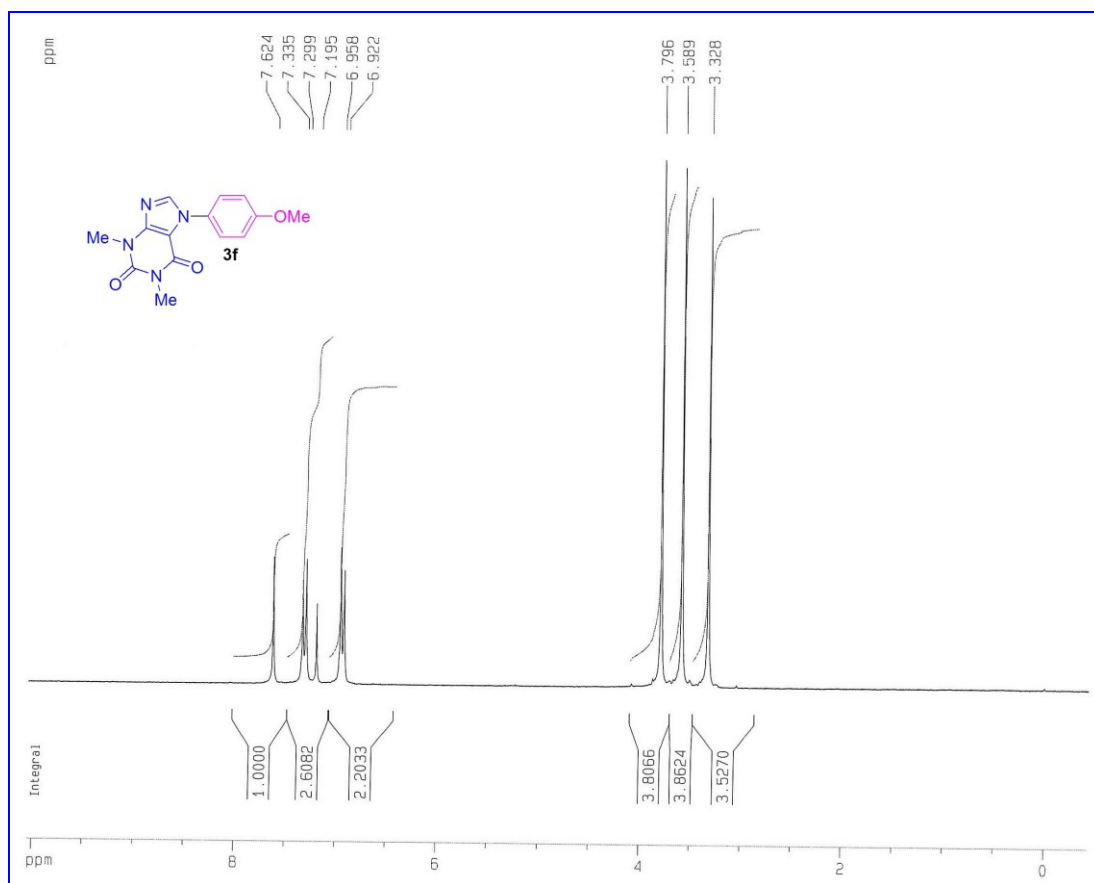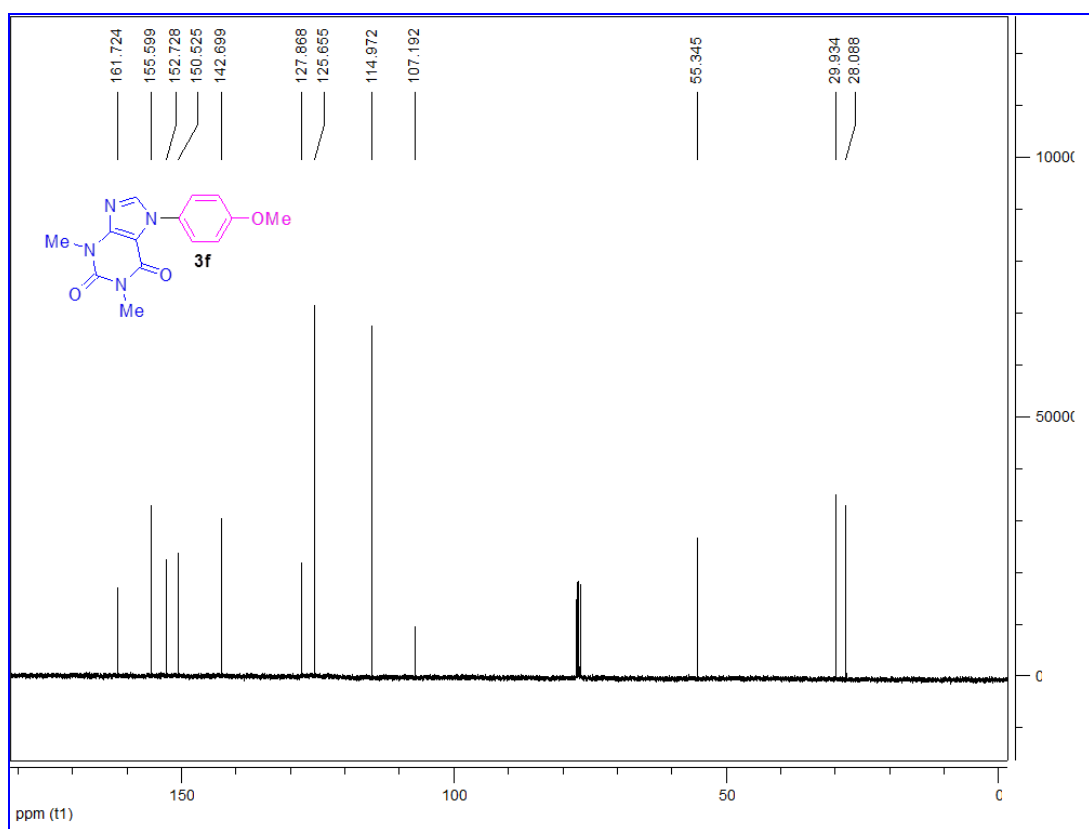

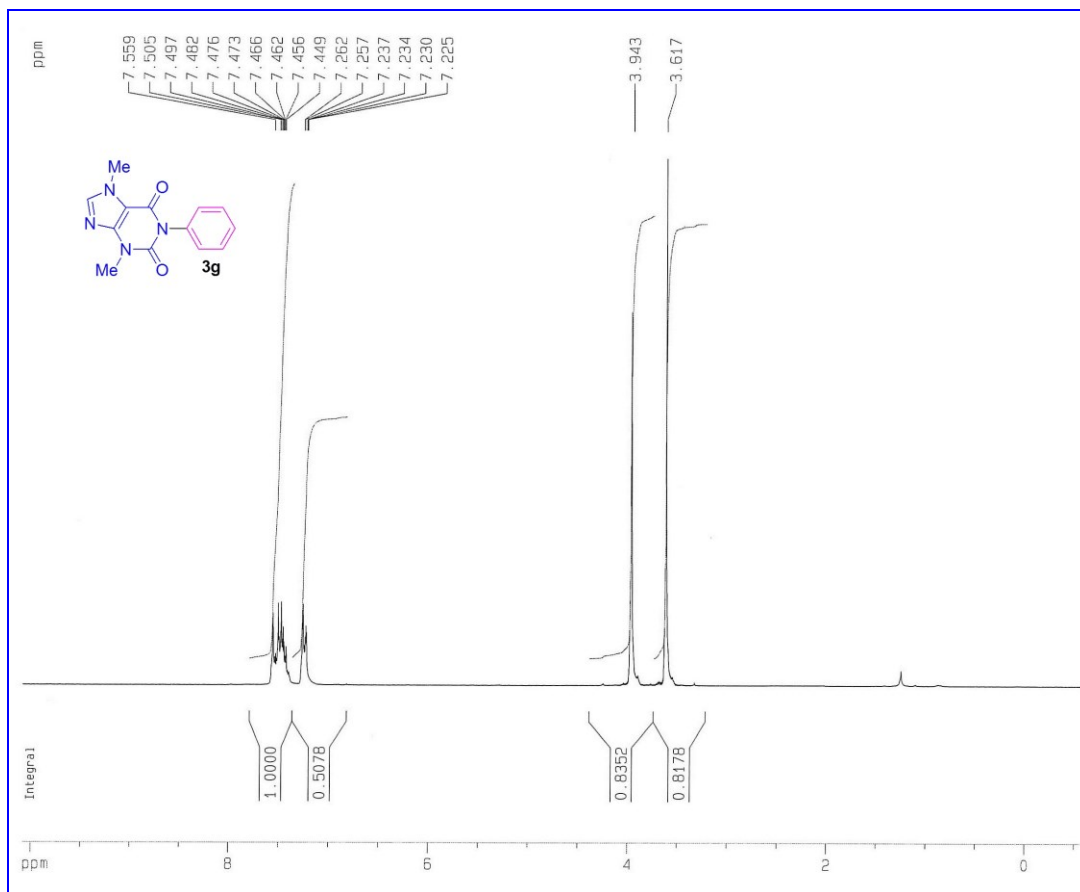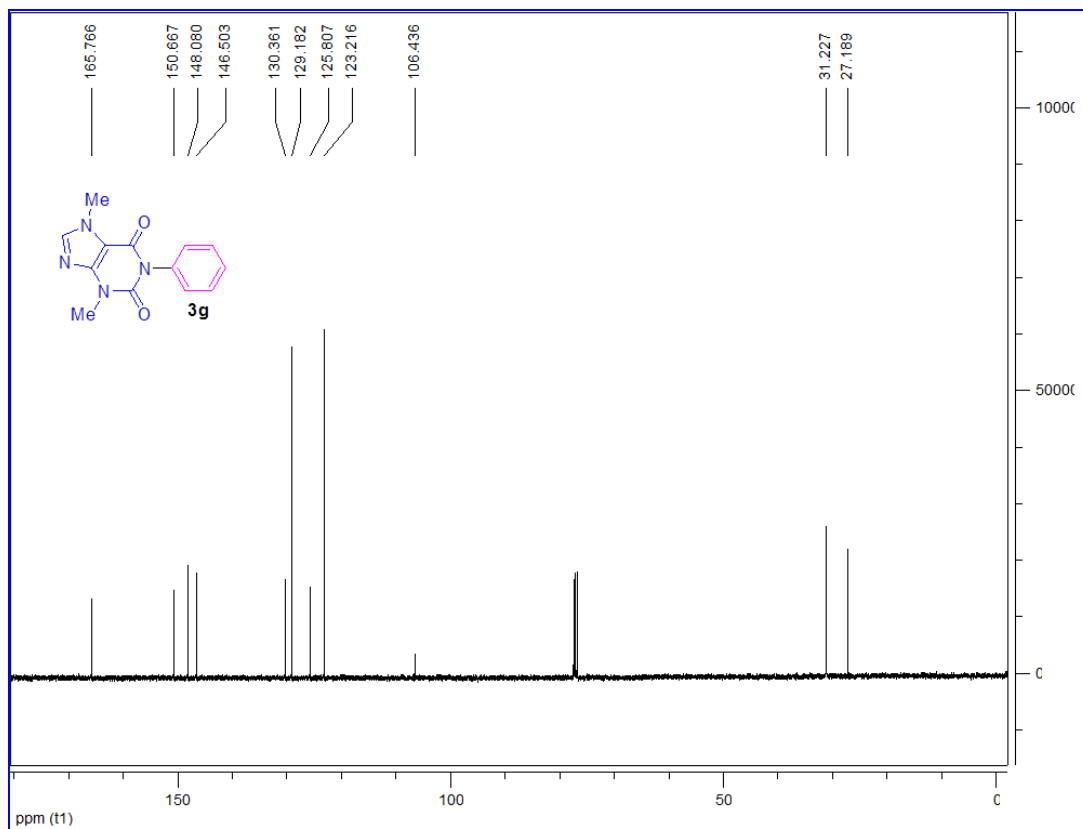

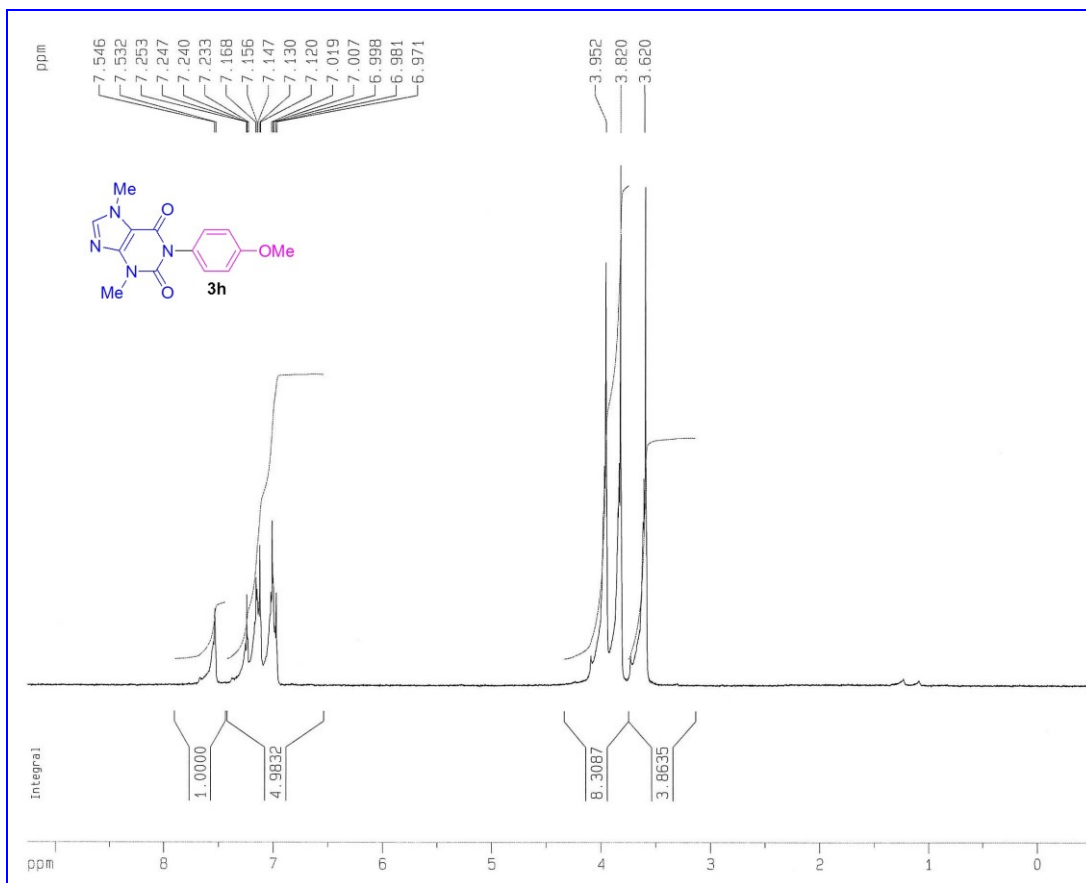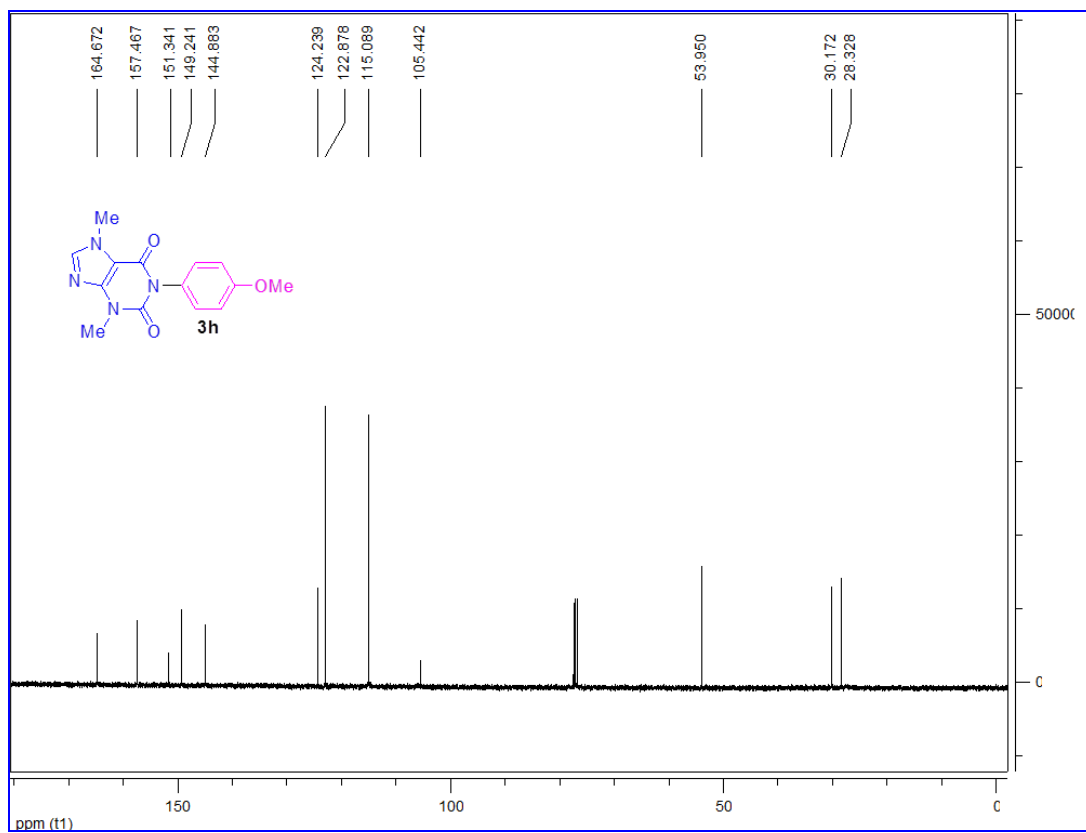

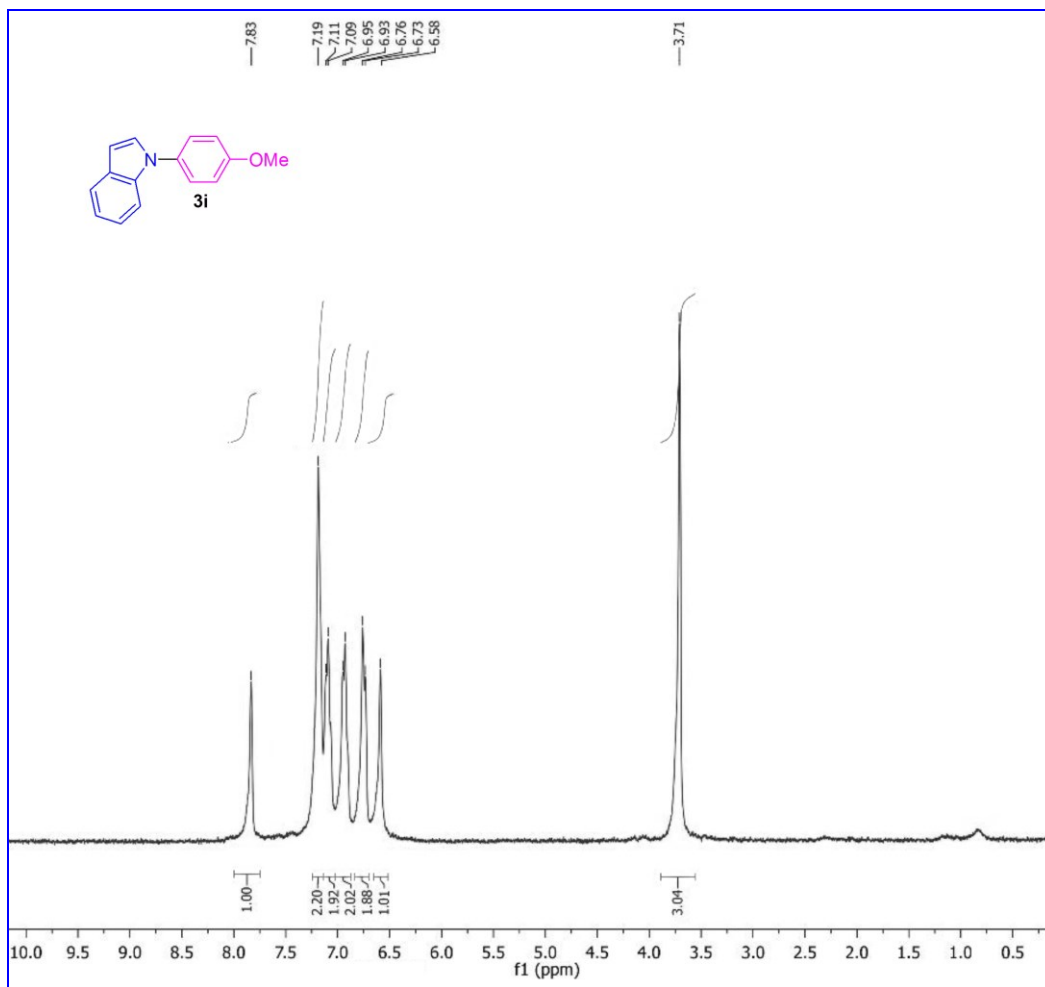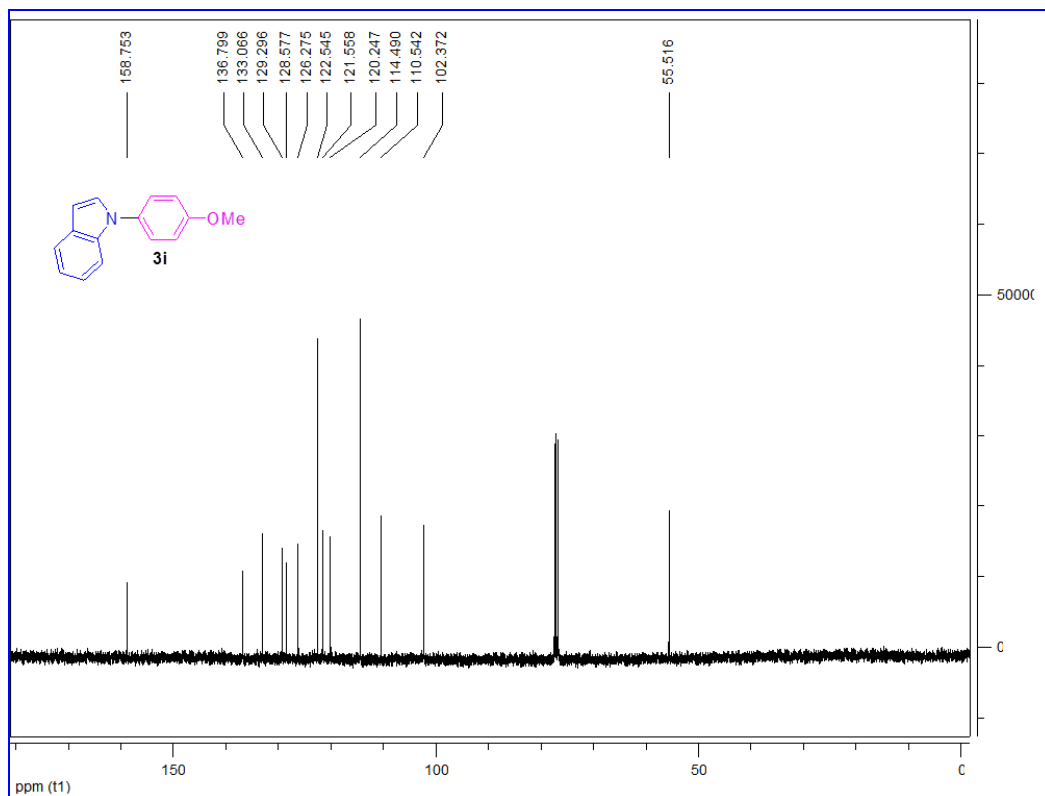



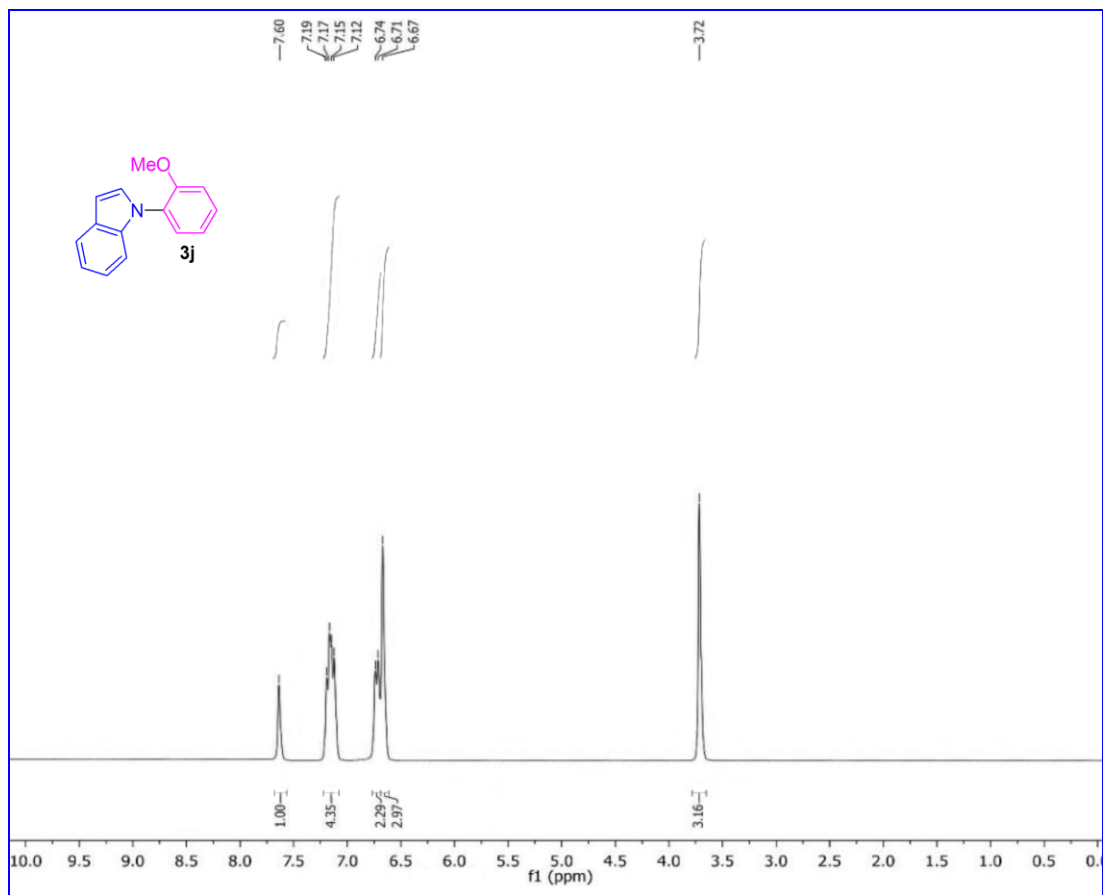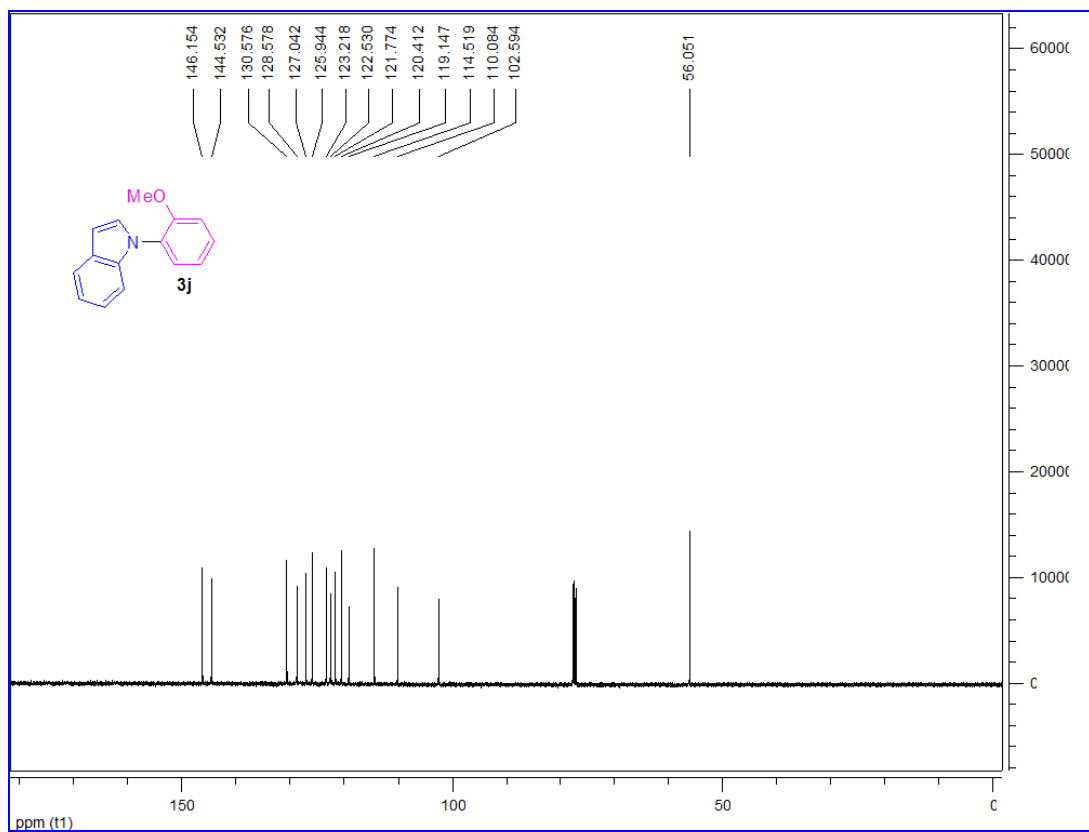

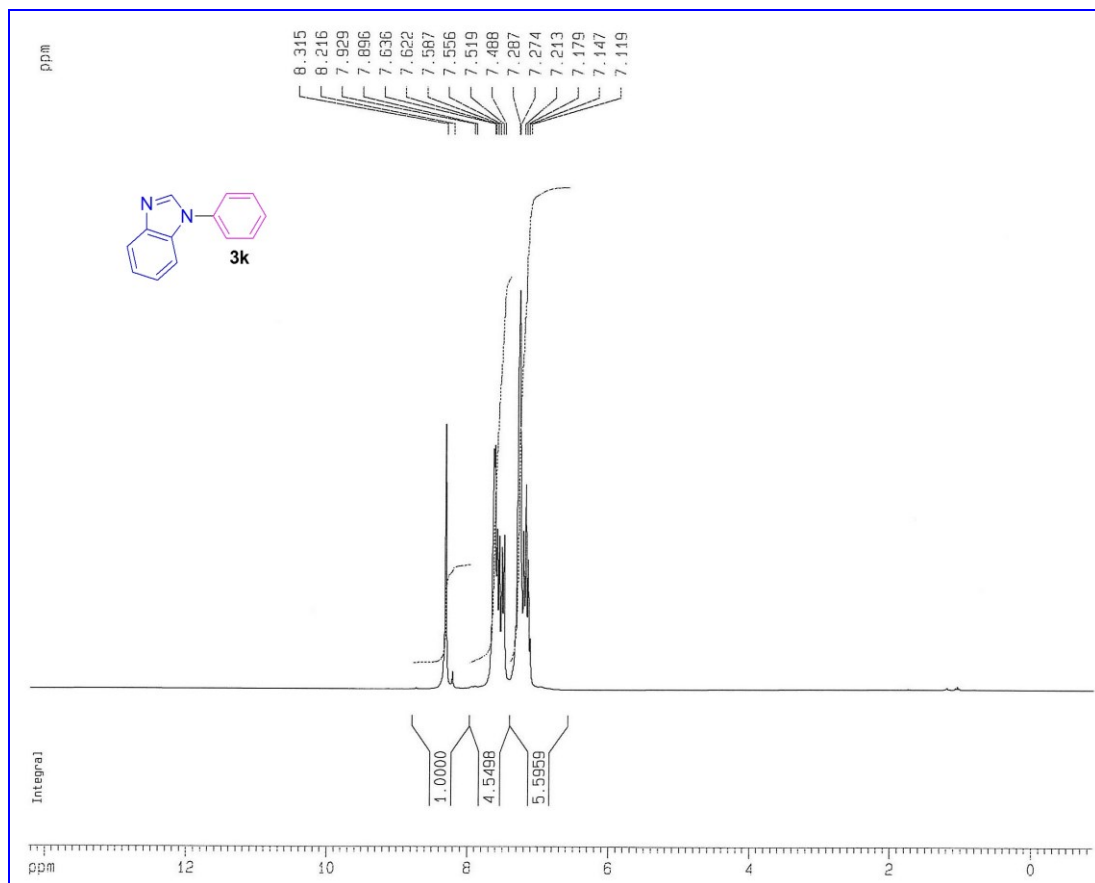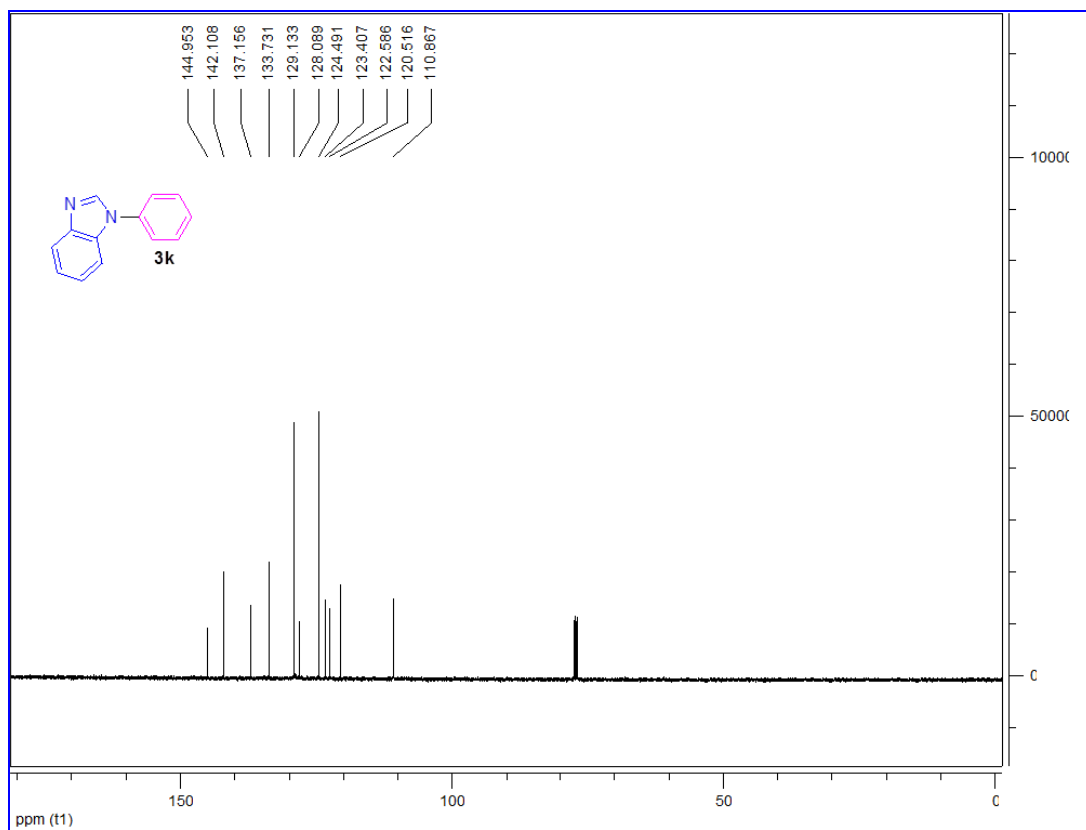

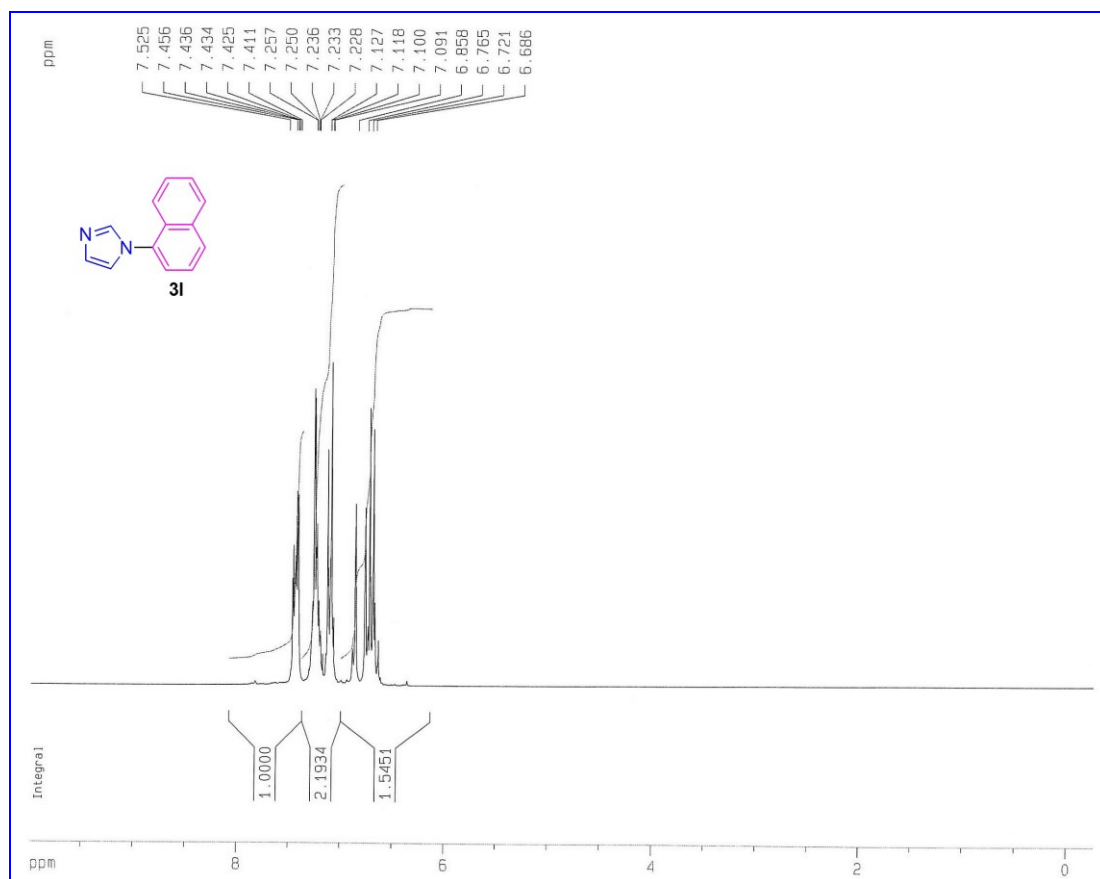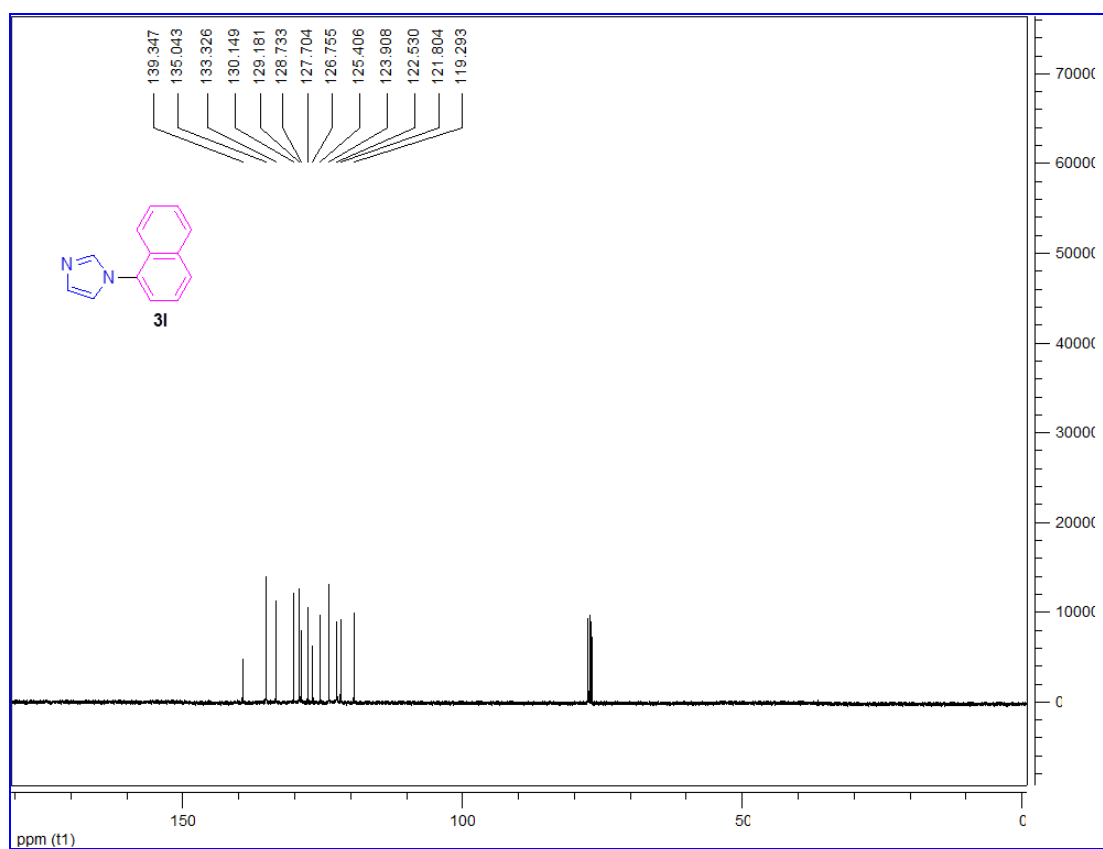

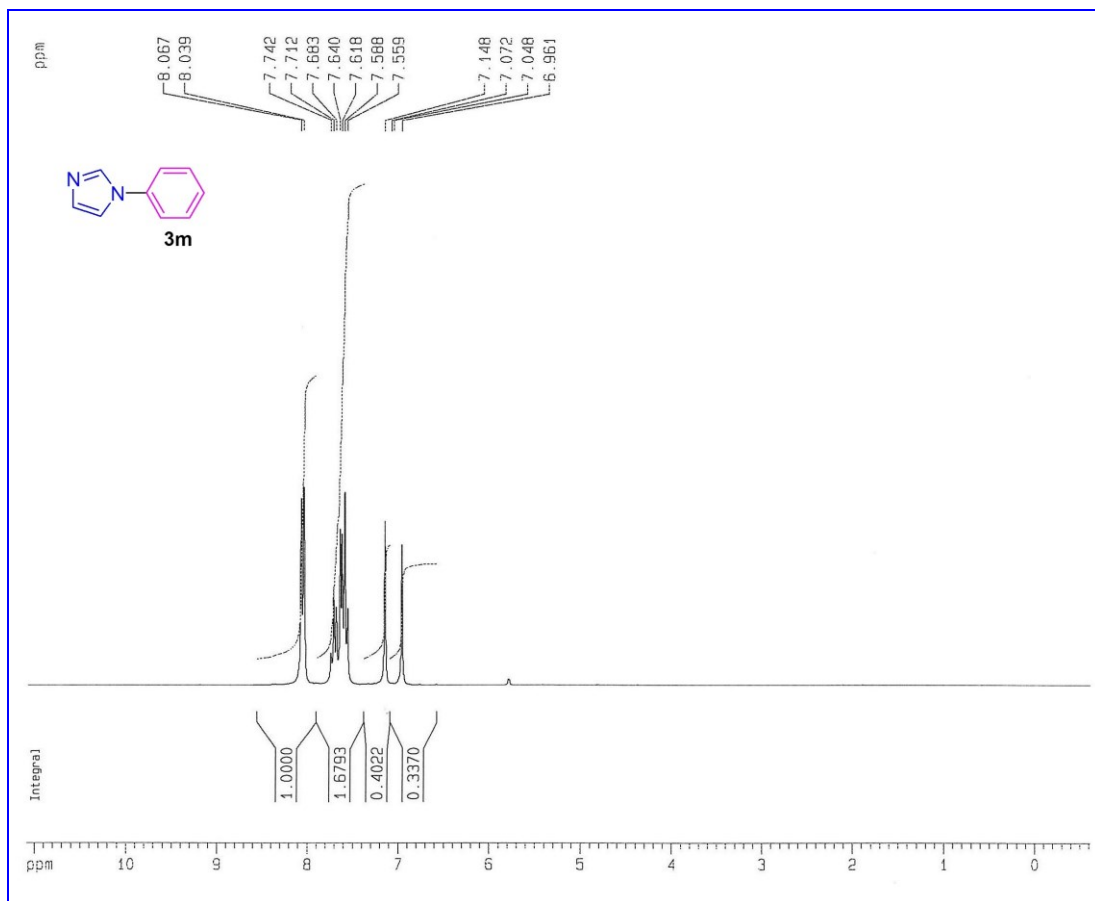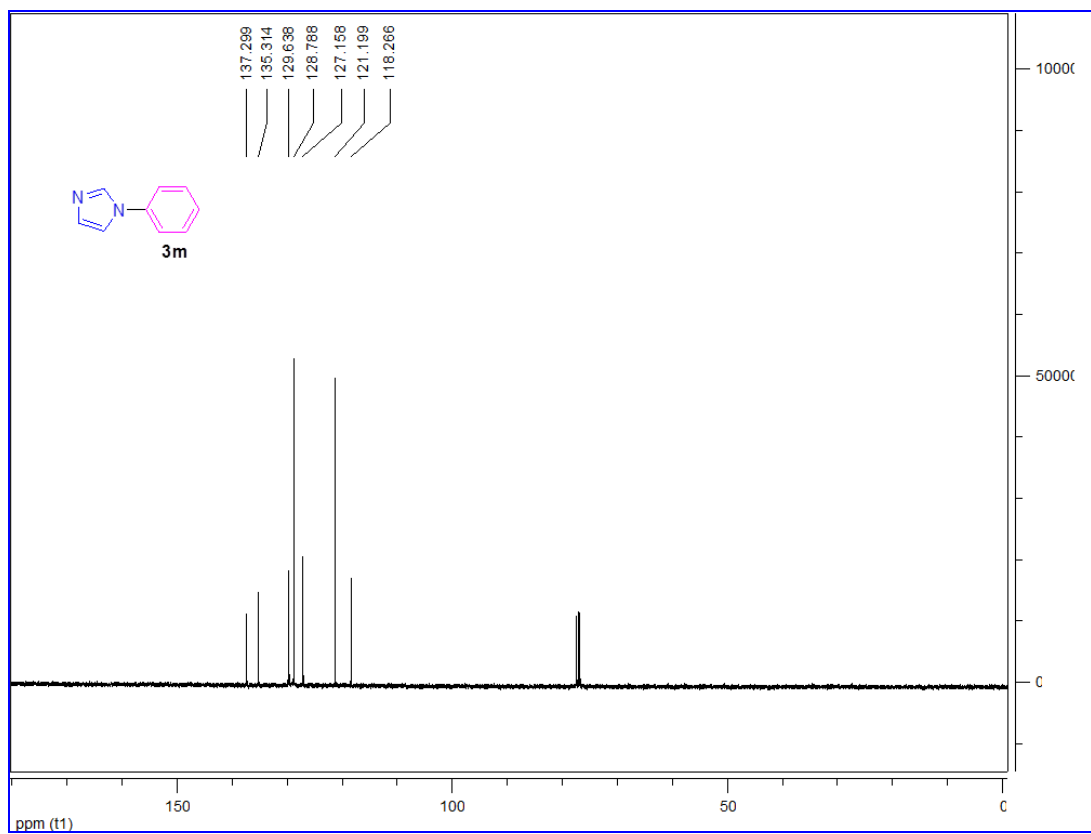

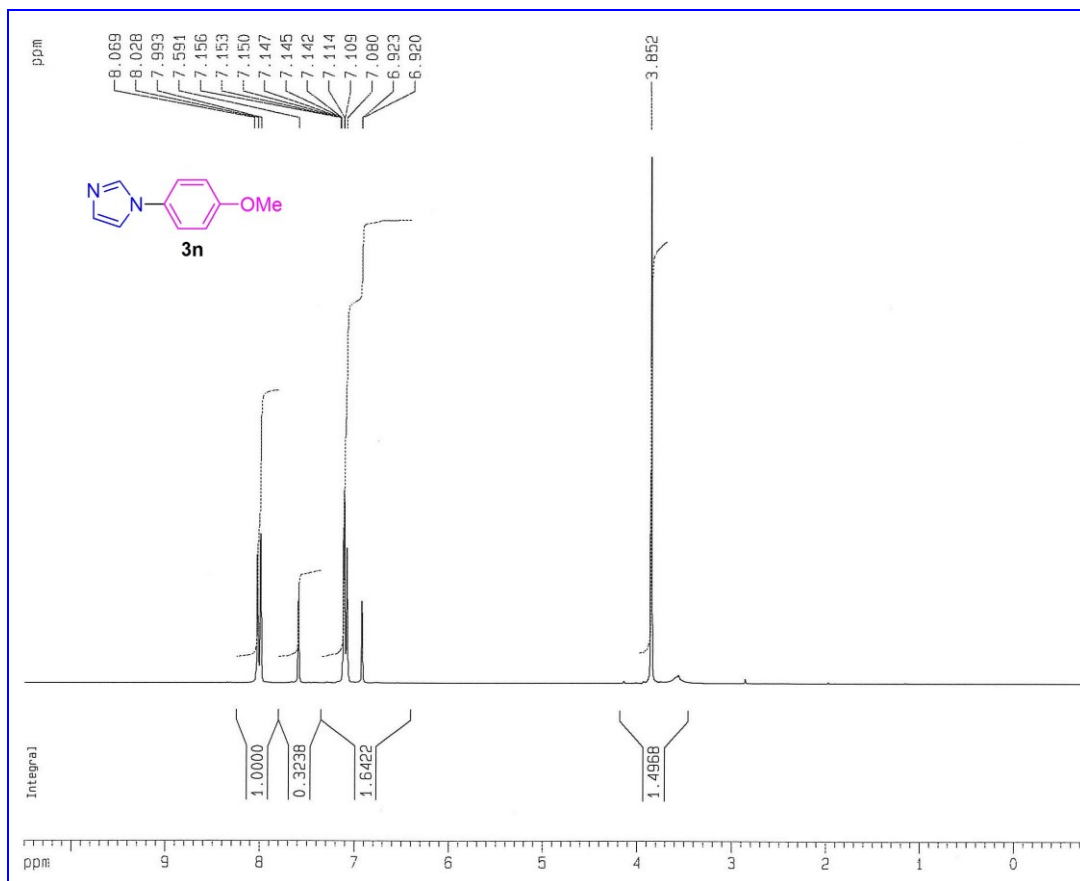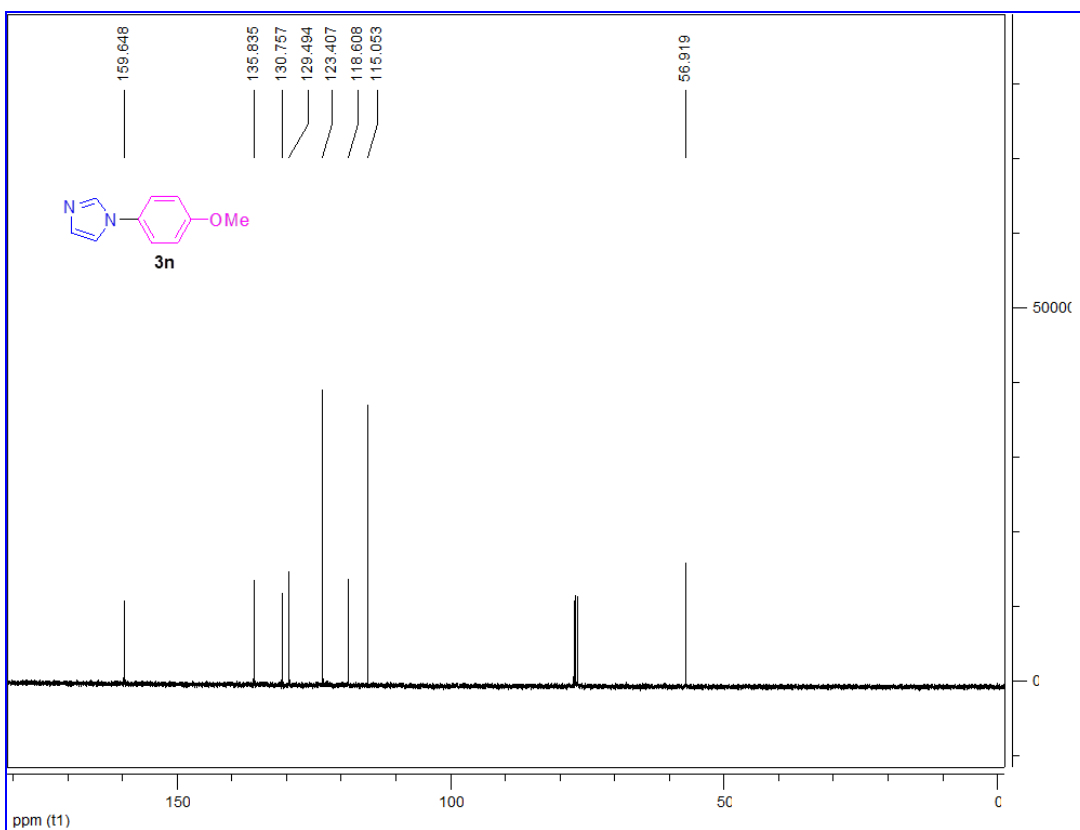

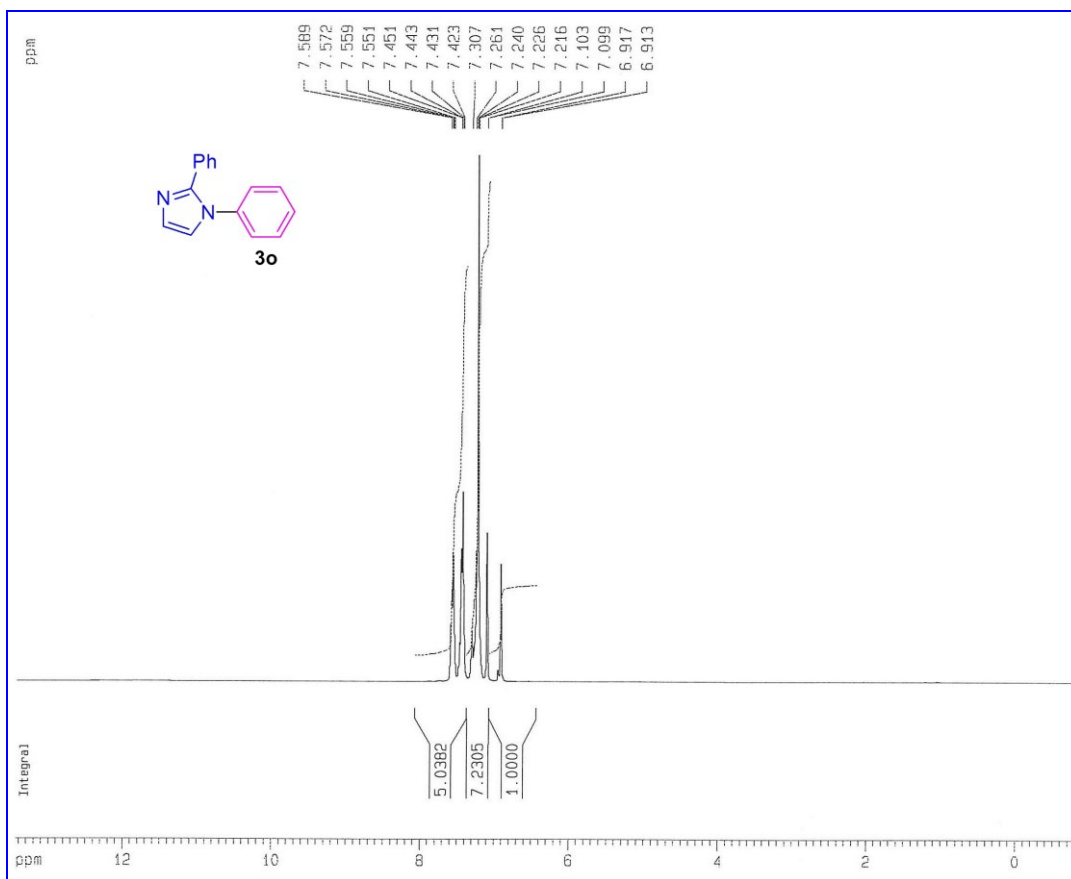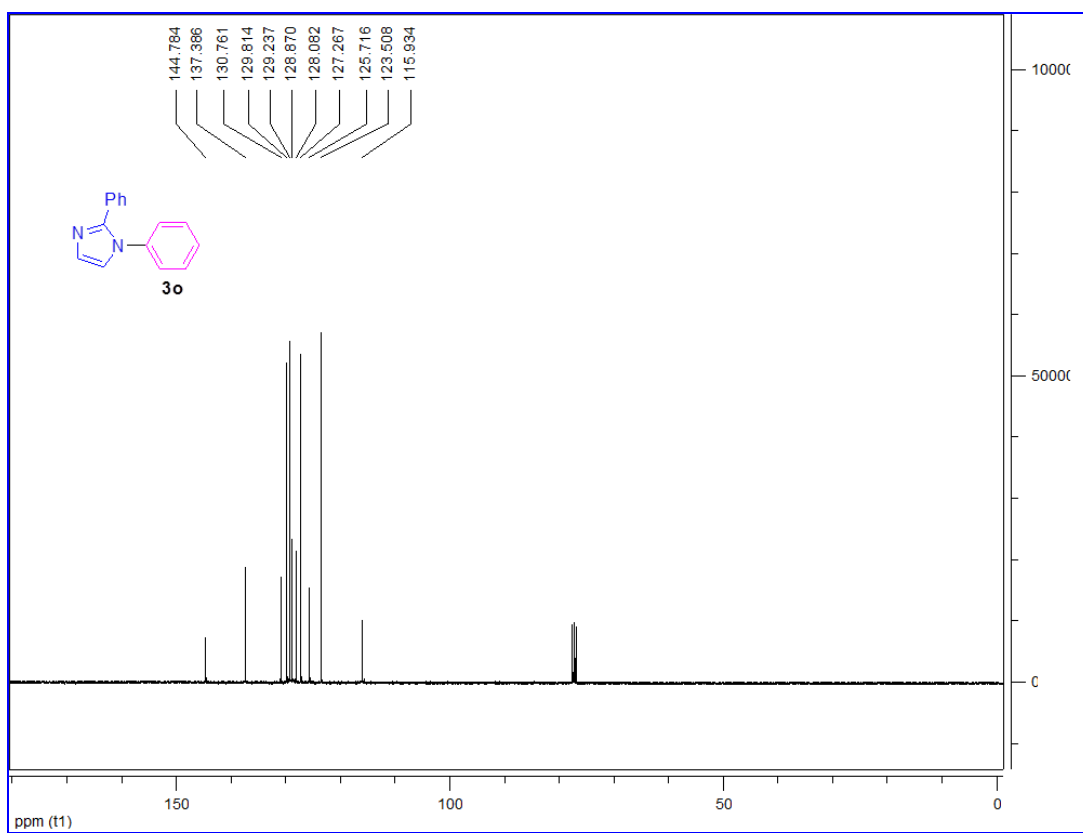

Supplement: d3ra06327e1.pdf [file d3ra06327e1.pdf]
